# Supplementary material for: ‘I feel like they’re actually listening to me’: a pilot study of a hospital discharge decision-making conversation guide for patients with injection drug use–associated infections
Source: PubMed Central journal article supplement — Ther Adv Infect Dis. 2023 Apr 3;10:20499361231165108. doi: 10.1177/20499361231165108 (PMC10074622; doi:10.1177/20499361231165108), 2023-04-03
Supplement: sj-pdf-2-tai-10.1177_20499361231165108.pdf [file sj-pdf-2-tai-10.1177_20499361231165108.pdf]

# Hospital discharge decision making for patients with substance use disorders and serious infections

## What's the evidence?

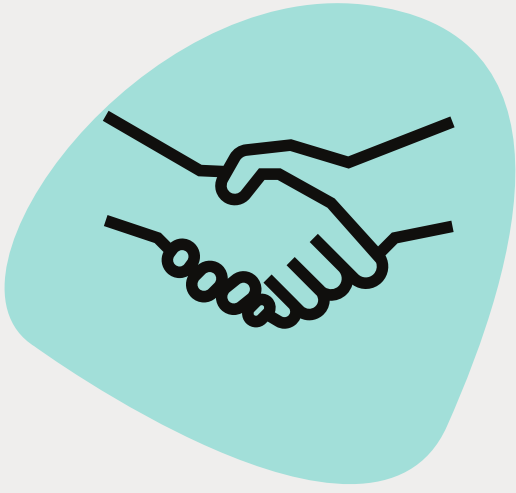

### A Harm Reduction Approach Can Improve Quality of Care

- Meet people where they are at: some patients may want their infection treated, **but may not want to stop using drugs.**

### Inpatient options

Prolonged hospitalizations for 4-6 weeks are often recommended due to limitations, barriers, stigma, or other reasons.

Challenges: Isolation, retaining employment, financial stress, family responsibilities, stigma

Rates of in-hospital drug use can be up to 40%

Less likely to complete prolonged course of antibiotics if no other options offered.

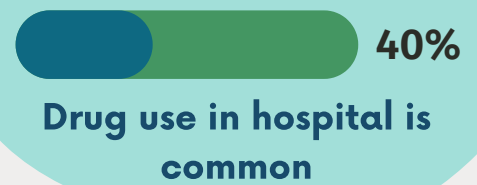

In a recent systematic review 72% to 100% of people successfully completed outpatient parental antimicrobial therapy (OPAT), which is similar to outcomes in patients without a history of injection drug use

### Outpatient options

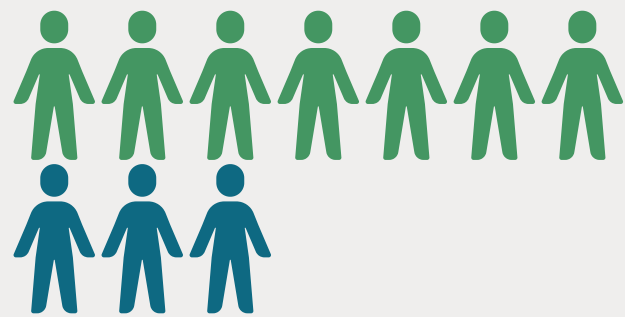

### Misuse of PICC lines are uncommon

0-2% of cases in literature

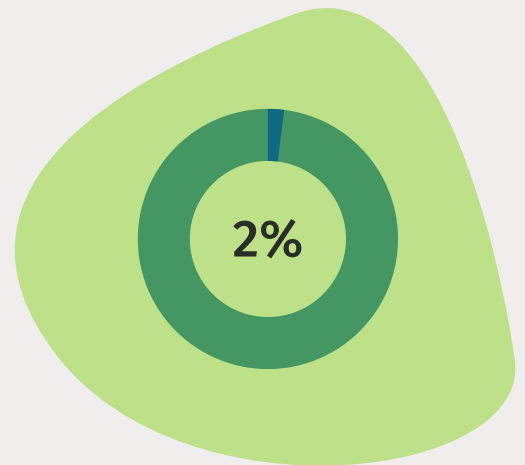

### Other options

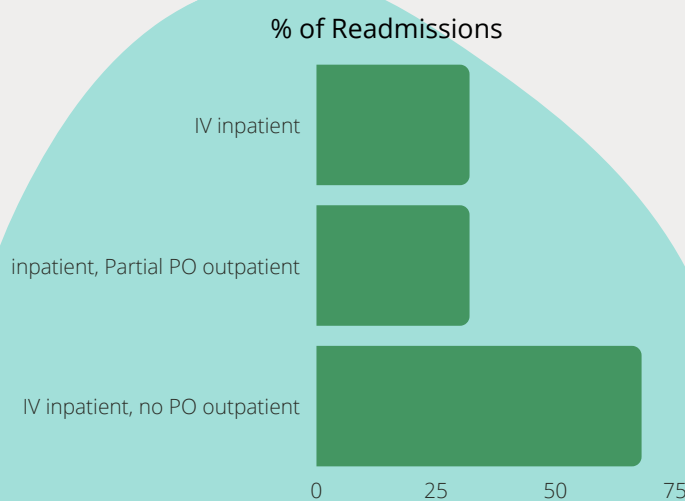

### Offer oral antibiotics

A single site study showed that giving SOME oral (PO) antibiotics is better than none at all if patients leave early

A 2021 systematic review of prospective, controlled trials showed that stepping down to PO antibiotics is effective in certain patients

### Off label IV antibiotics

Long acting IV antibiotics are approved for skin & soft tissue infections. Off-label use for endocarditis and osteomyelitis has been described, though more studies are needed. A randomized trial of n=80 patients with osteomyelitis showed that 2 doses of a long acting IV antibiotic was effective. Here's what we know from one case series of n=32 people who use drugs with serious *Staphylococcus aureus* infections:

- 56% clinical response
- 31% lost to follow up
- Average cost/dose ~ \$4,000

### References

- 1) Lennox et al IJDP 2021
- 2) McNeil R, Soc Sci Med 2014
- 3) Fanucchi et al J Subst Abuse Treat 2018
- 4) Suzuki et al OFID 2018
- 5) Fanucchi et al CID 2020
- 6) Marks LR et al CID 2019
- 7) Wald-Dickler et al Am J Med 2021
- 8) Rappo OFID 2018
- 9) Bryson-Cahn 2019

# Antimicrobial Discharge Considerations

- **Patient goals and preferences**
  - *Understands risks/benefits of options (see conversation guide)*
- **Infection type**
  - *Antimicrobial treatment duration and options*
- **Antimicrobial administration and setting**
  - *Phone, insurance, transportation, environment*
- **Substance use history**
  - *Should not necessarily exclude someone from being discharged with PICC*
- **Discharge needs**
  - *Nursing or other services needed*
- **Access to outpatient care**
  - *(PCP, mental health, ID, substance use)*

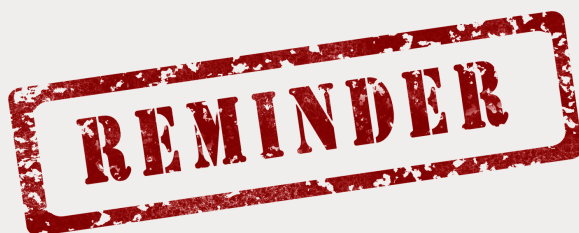

Prior to discharge, discuss:

- ✓ **Overdose prevention**
  - *Prescribe naloxone*
- ✓ **Infection prevention**
  - *Safer use*
  - *Vaccinations*
  - *STD screening*
  - *Pre-exposure prophylaxis for HIV*
  - *TB screening*
  - *Referral for viral hepatitis care*

## References

Sikka et al, BMJ 2021

Thakarar et al, PMJ 2016
